# Supplementary material
Source: MDPI journal article supplement (https://www.mdpi.com/2073-4344/13/6/1020)
Supplement: s1 [file s1 › catalysts-2292359-supplementary.pdf]

# Supporting Information

## Electrolessly deposited carbon-supported CuNiSn electrocatalysts for the electrochemical reduction of CO<sub>2</sub>

Wasu Chaitree<sup>1</sup>, Atikom Hongmeuan<sup>2</sup>, Piriya Pinthong<sup>2</sup>, and Joongjai Panpranot<sup>2,\*</sup>

<sup>1</sup>Department of Chemical Engineering, Faculty of Engineering and Industrial Technology, Silpakorn University, NakornPathom 73000, Thailand

<sup>2</sup>Center of Excellence on Catalysis and Catalytic Reaction Engineering, Department of Chemical Engineering, Faculty of Engineering, Chulalongkorn University, Bangkok 10330, Thailand

\*Corresponding Author E-mail Address: joongjai.p@chula.ac.th

### SEM images with a magnification x 1000

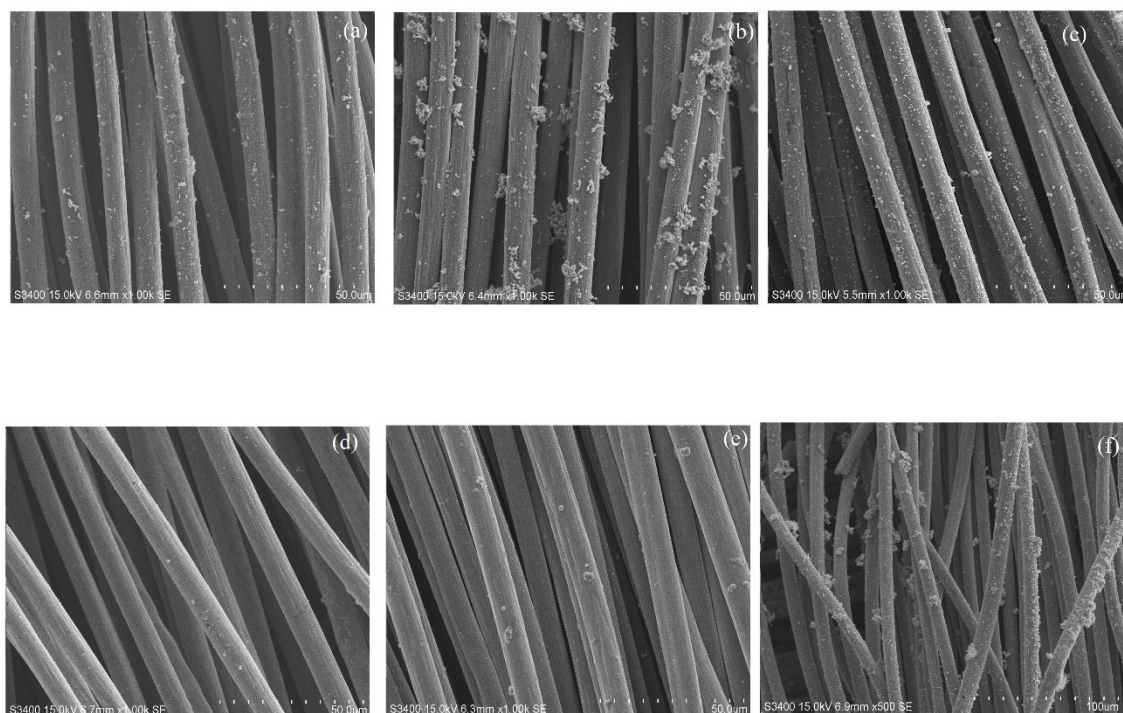

**Figure S1.** SEM images of (a) CuNiSn/CS, (b) CuSn/CS, (c) CuNi/CS, (d) NiSn/CS, (e) Ni/CS and (f) Cu/CS

### <sup>1</sup>H-NMR spectra of the electrolyte

<sup>1</sup>H-NMR spectra of the electrolyte under a constant potential of -1.6 V vs. Ag/AgCl for 150 min over studied electrocatalysts showed that they were composed of formate, 1-butanol, ethylene glycol, acetone, and ethanol, and DMSO (internal standard). The purple, blue, red, pink, orange, and green circles represent the peaks of formate, 1-butanol, ethylene glycol, ethanol, acetone, and acetate, respectively. However, a trace amount of 1-butanol was observed.

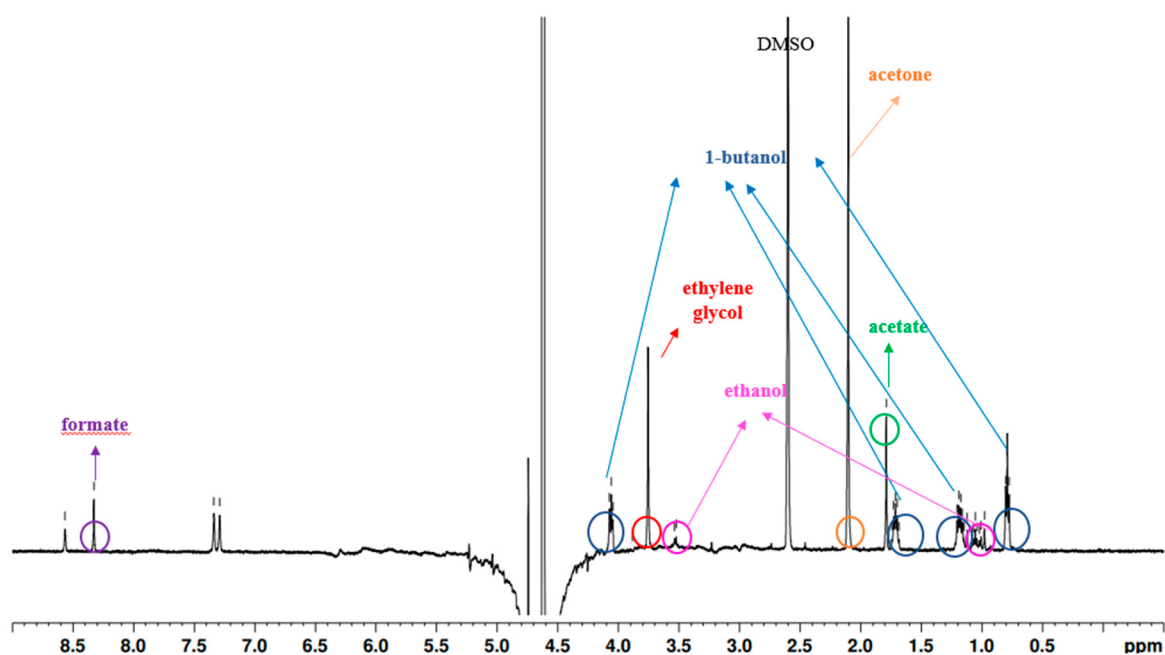

**Figure S2.** <sup>1</sup>H NMR spectrum over CuNiSn/CS

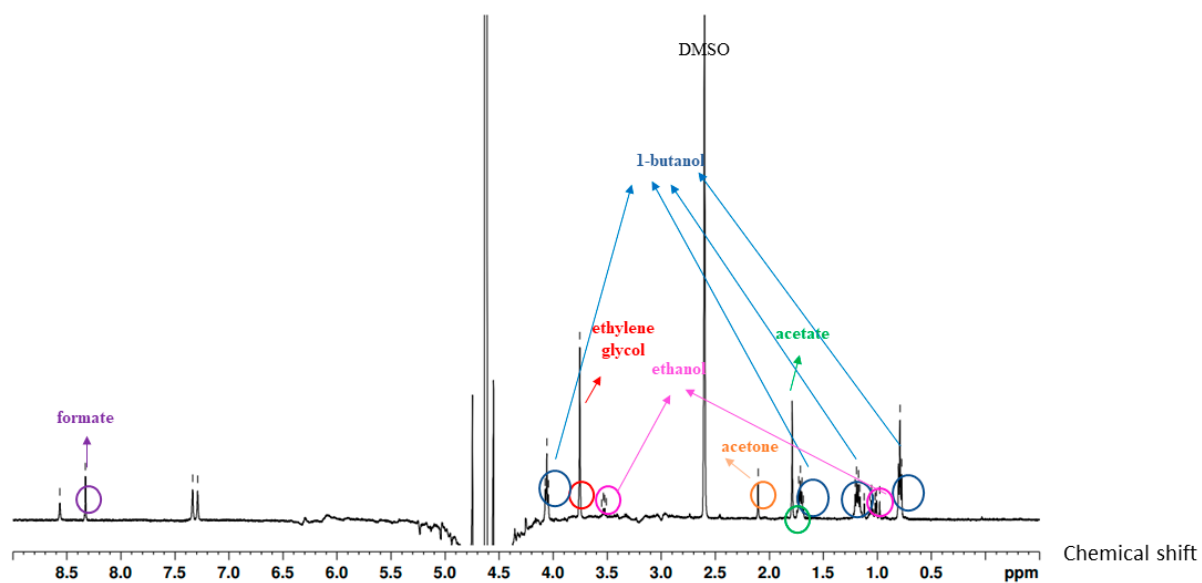

Figure S3.  $^1\text{H}$  NMR spectrum over CuNi/CS

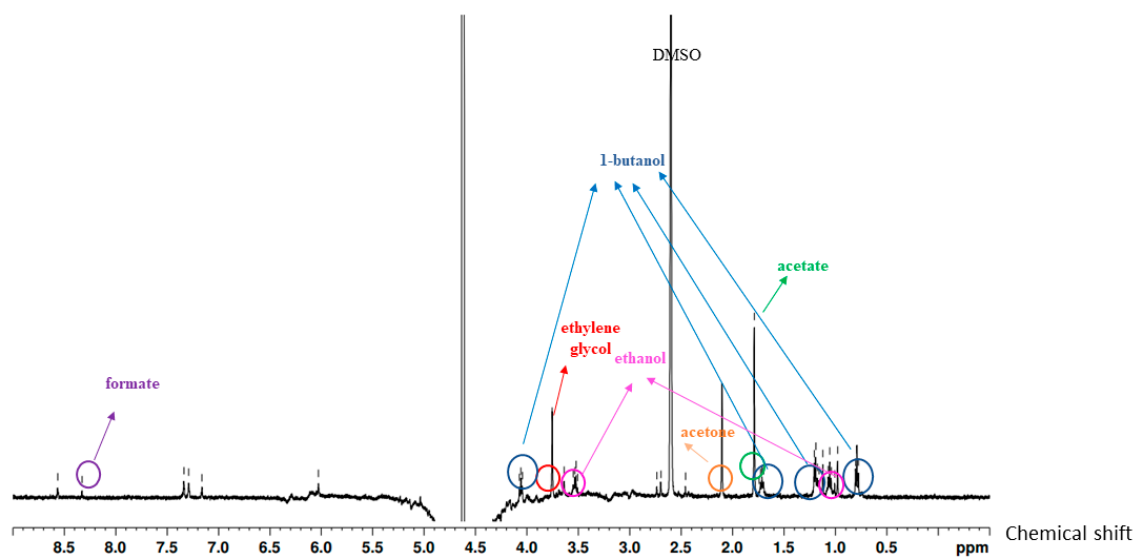

Figure S4.  $^1\text{H}$  NMR spectrum over NiSn/CS

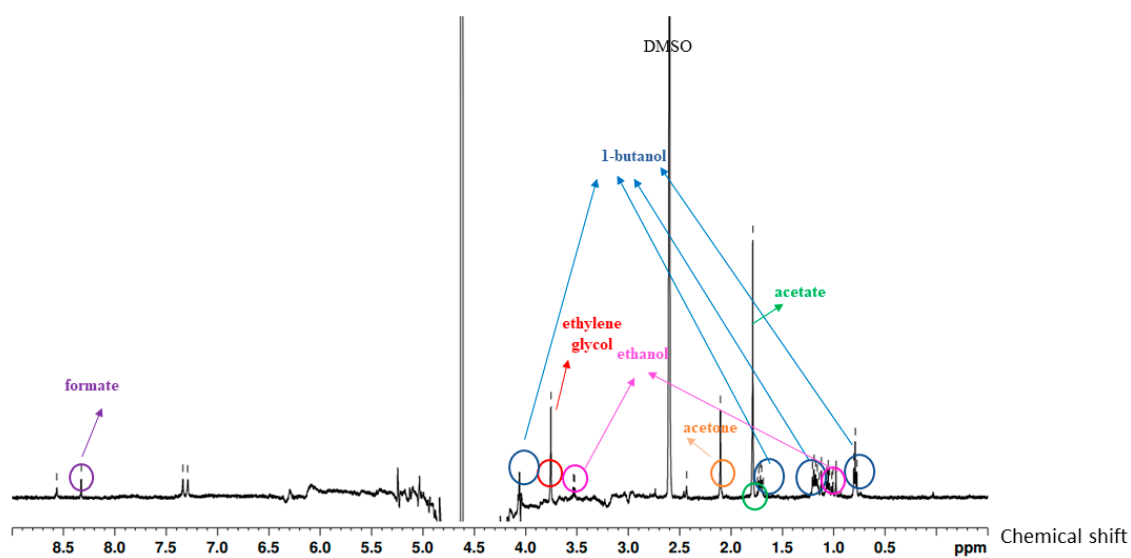

Figure S5.  $^1\text{H}$  NMR spectrum over Ni/CS

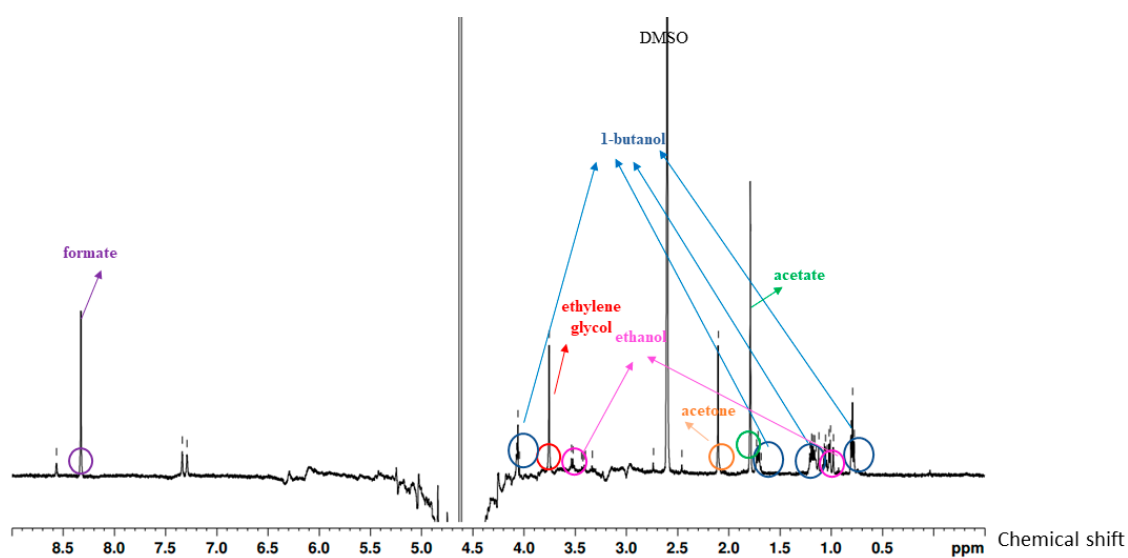

Figure S6.  $^1\text{H}$  NMR spectrum over Cu/CS

### A gas chromatography

A gas chromatography (GC) system with a thermal conductivity detector (TCD) was used to detect  $\text{H}_2$  and  $\text{CO}$  and the operating condition of GC was shown in Table S.1. Numbers on chromatogram are retention times of  $\text{H}_2$ ,  $\text{O}_2$ ,  $\text{N}_2$ ,  $\text{CO}$ , and  $\text{CO}_2$ .

**Table S1.**The operating conditions of gas chromatograph with a thermal conductivity detector

| Gas chromatography (Shimadzu GC-2014) | Conditions            |
|---------------------------------------|-----------------------|
| Detector                              | TCD                   |
| Column information                    | Shincarbon ST(50/80)  |
| Carrier gas                           | Helium (99.999%)      |
| Injector temperature                  | 180°C                 |
| Column initial temperature            | 40°C, Hold time 5 min |
| Column temperature rate               | 10°C/min              |
| Column final temperature              | 200°C                 |
| Detector temperature                  | 170°C                 |
| Total time analysis                   | 21 min                |

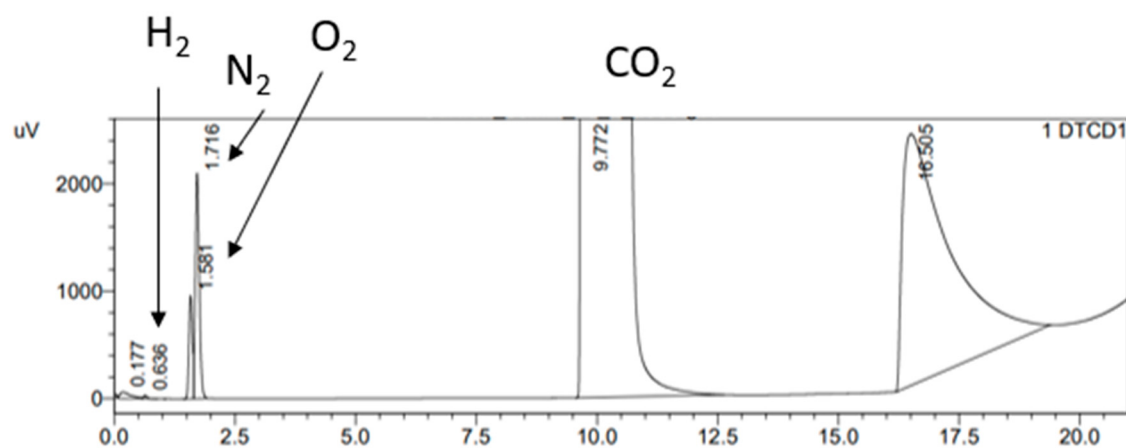

**Figure S7.** Chromatogram generated by a GC of CuNiSn/CS

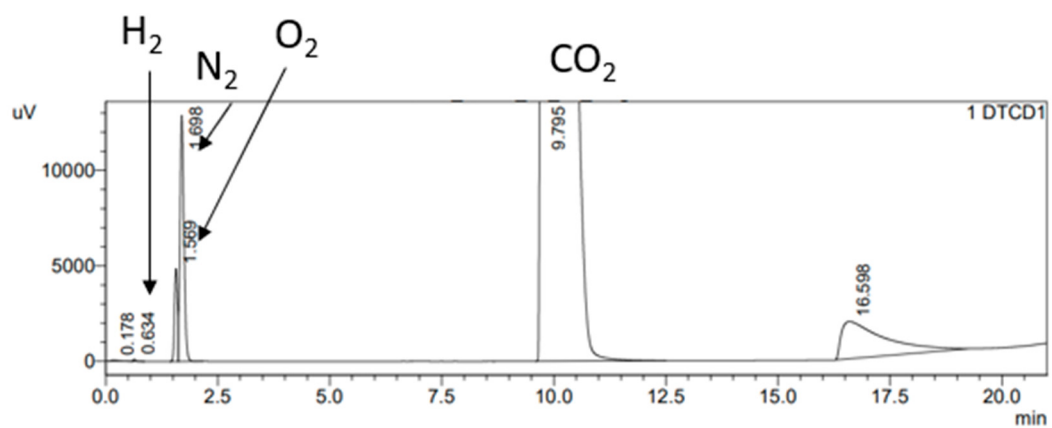

**Figure S8.** Chromatogram generated by a GC of CuNi/CS

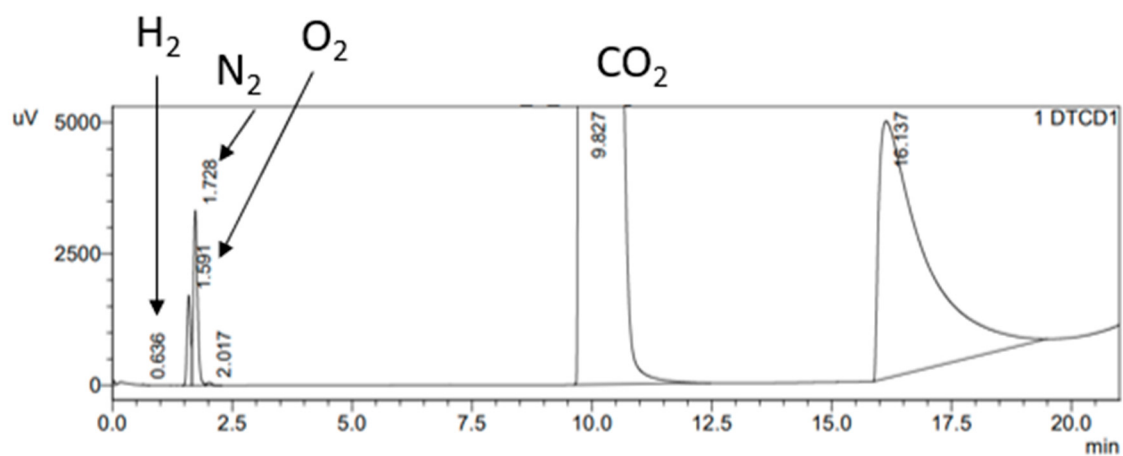

**Figure S9.** Chromatogram generated by a GC of NiSn/CS<sub>30</sub>

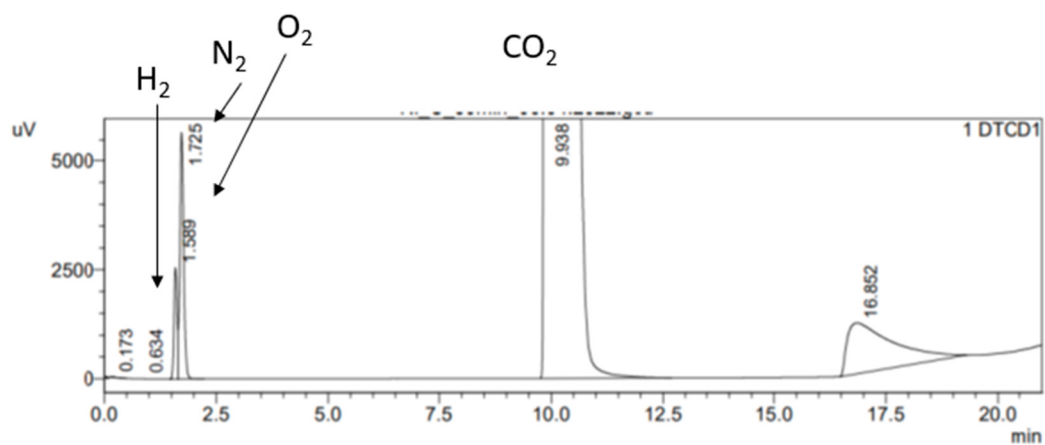

Figure S10. Chromatogram generated by a GC of Ni/CS<sub>30</sub>

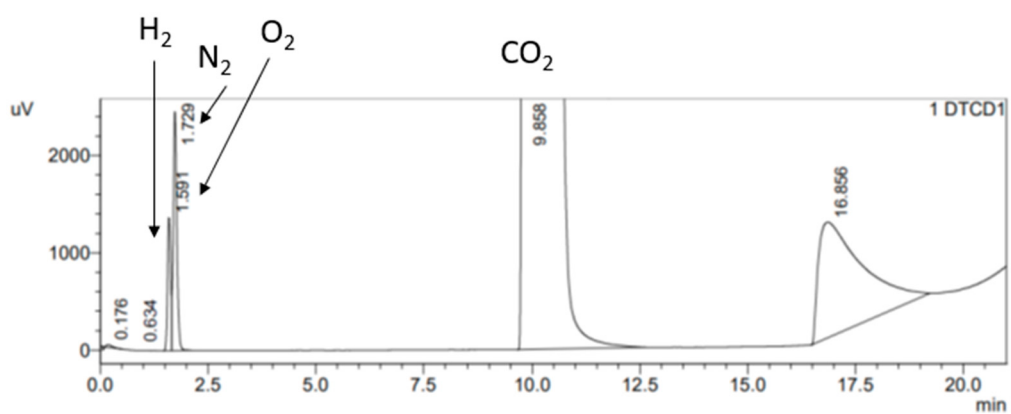

Figure S11. Chromatogram generated by a GC of Cu/CS<sub>30</sub>
